# Supplementary material for: Construction of the Bi2WO6/Bi4V2O11heterojunction for highly efficient visible-light-driven photocatalytic reduction of Cr(vi)
Source: Royal Society of Chemistry journal article supplement (doi:10.1039/c7nj03413j), 2017-11-27
Supplement: c7nj03413j1.pdf [file c7nj03413j1.pdf]

Supporting Information

## Construction of $\text{Bi}_2\text{WO}_6/\text{Bi}_4\text{V}_2\text{O}_{11}$ heterojunction for highly efficient visible-light-driven photocatalytic reduction of Cr(VI)

Chol-Nam Ri\*, Song-Gol Kim, Ju-Yong Jong, Sung-Nam Pak, Song-Chon Ri and Jong-Hwa Ri

Institute for electronic materials, Kim Il Sung University, Pyongyang, 999093, Democratic People's Republic of Korea

\*Corresponding Author: rcn906@yahoo.com

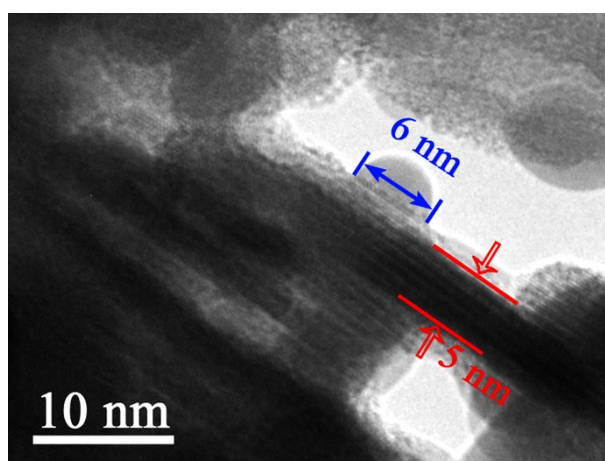

Fig. S1. TEM image of BWV-82 sample.

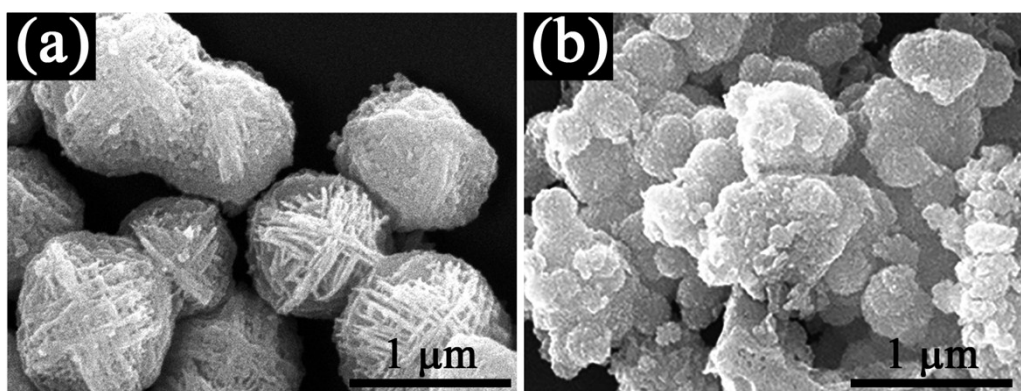

Fig. S2. SEM images of (a) BWV-46 and (b) BWV-64 samples.

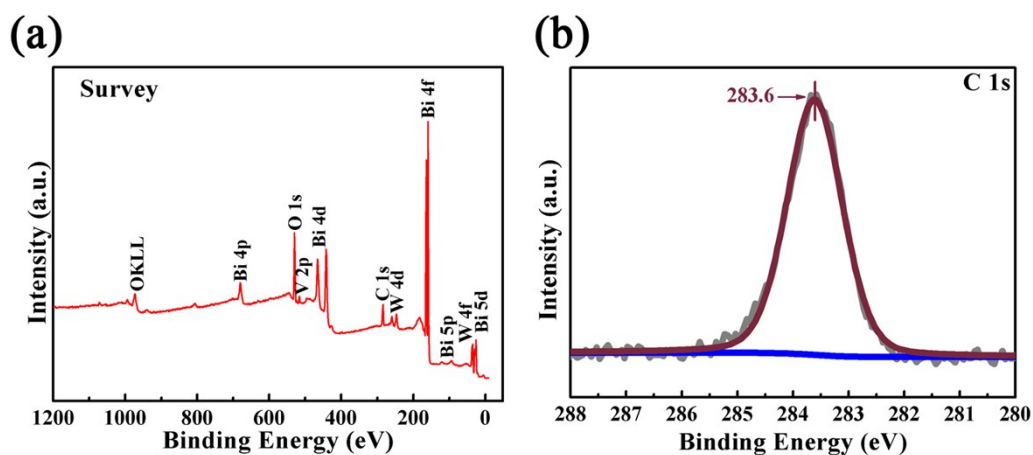

**Fig. S3.** XPS spectra of BWV-82 sample: (a) survey, (b) C 1s.

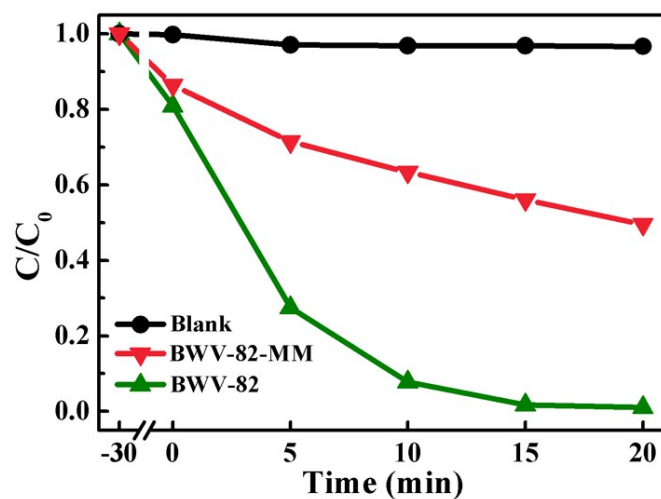

**Fig. S4.** photocatalytic reduction curves of Cr(VI) aqueous solution over the BWV-82-MM (mechanical mixed sample) and the BWV-82 heterojunction photocatalyst under visible-light irradiation.

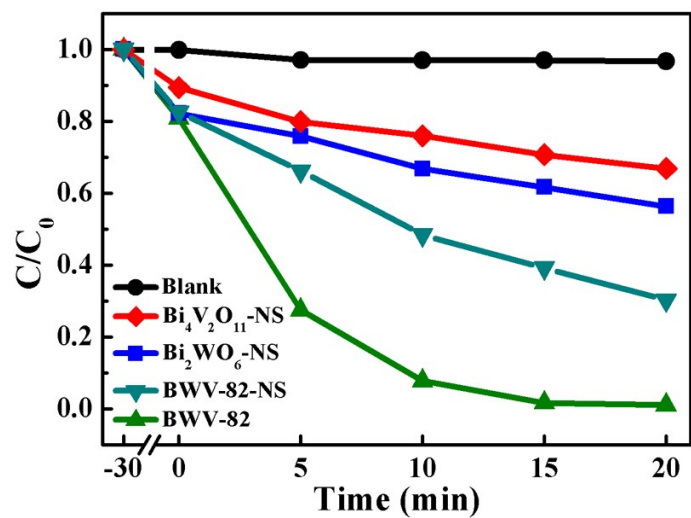

**Fig. S5.** photocatalytic reduction curves of Cr(VI) aqueous solution over the BWV-82-NS (without citric acid as a hole scavenger) and the BWV-82 heterojunction photocatalyst (with citric acid) under visible-light irradiation.
